# Supplementary material
Source: PubMed Central journal article supplement (PMC7223541)
Supplement: 41579_2019_288_MOESM1_ESM.pdf [file 41579_2019_288_MOESM1_ESM.pdf]

# The global preclinical antibacterial pipeline

---

*Ursula Theuretzbacher, Kevin Outterson, Aleks Engel and Anders Karlén*

<https://doi.org/10.1038/s41579-019-0288-0>

## Supplementary Figures

Ursula Theuretzbacher, Kevin Outterson, Aleks Engel, Anders Karlén:

### The global preclinical antibacterial pipeline

Figure 1. R&D focus of SMEs with antibacterial preclinical projects according to geographic location (n=255)

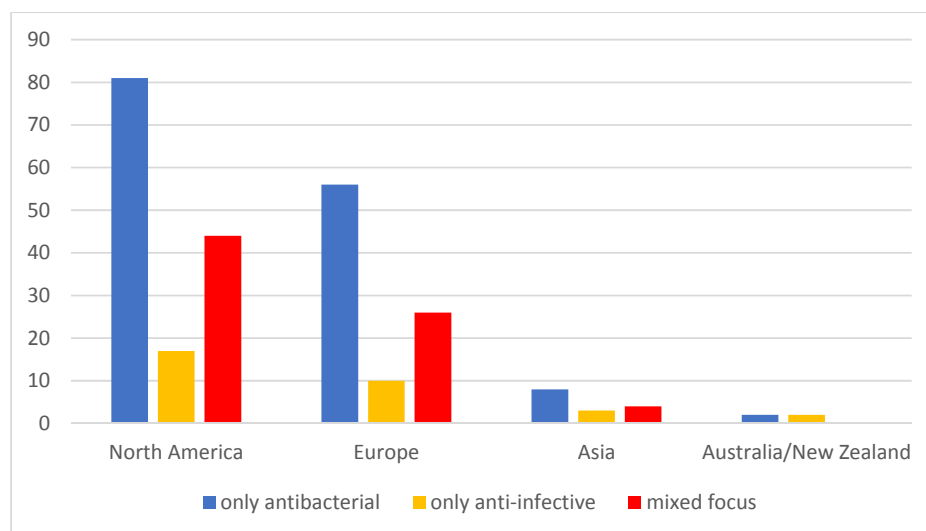

Figure 2. Preclinical projects with different approaches to potentiate antibiotics (n=32)

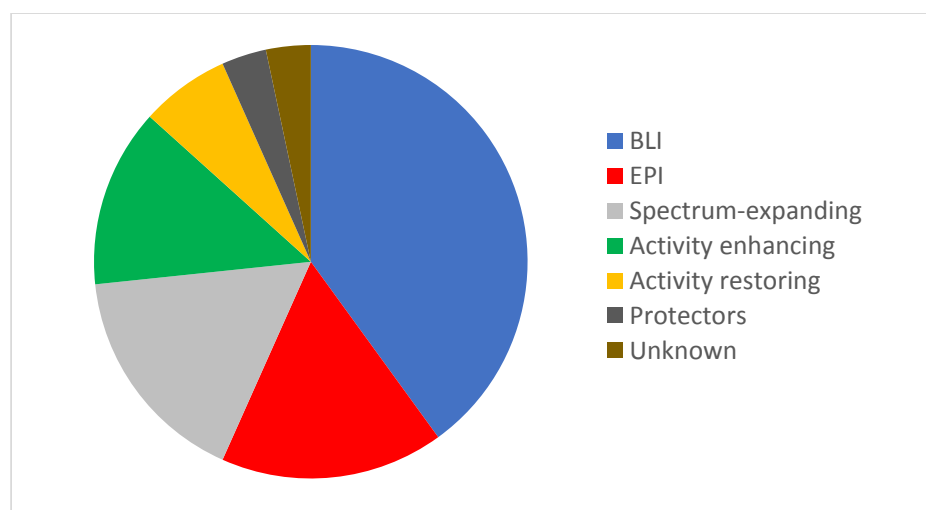

BLI= Beta-lactamase inhibitor, EPI= Efflux pump inhibitor
